# Supplementary material for: MicroRNA-29B (mir-29b) regulates the Warburg effect in ovarian cancer by targeting AKT2 and AKT3
Source: PubMed Central journal article supplement (PMC4747369; doi:10.18632/oncotarget.5695), 2015-10-20
Supplement: oncotarget-06-40799-s001.pdf [file oncotarget-06-40799-s001.pdf]

## SUPPLEMENTARY FIGURES

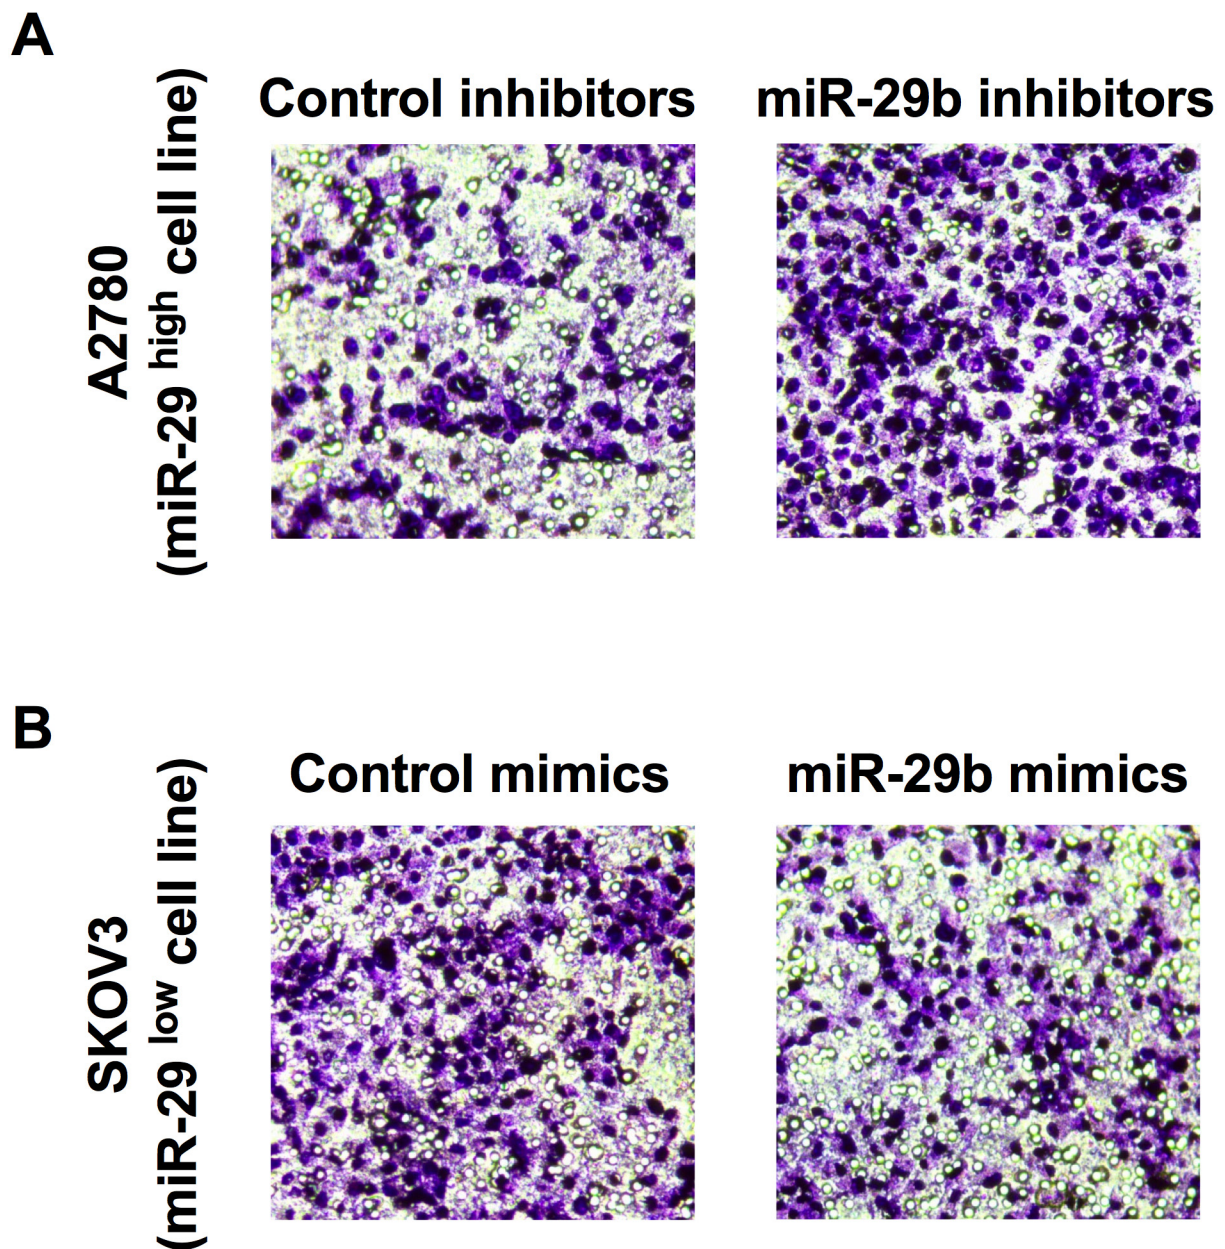

**Supplementary Figure S1: miR-29b expression negatively correlates with ovarian cancer cell migration capacity (Transwell migration assay).** **A.** In a transwell migration assay, target inhibitors-mediated miR-29b knockdown in A2780 cells leads to a significant increase in migrating capacity. **B.** In a transwell migration assay, target mimics-mediated miR-29b overexpression in SKOV3 cells leads to a significant decrease in migrating capacity. The images of the transwell migration assays were photographed under 400× magnification.

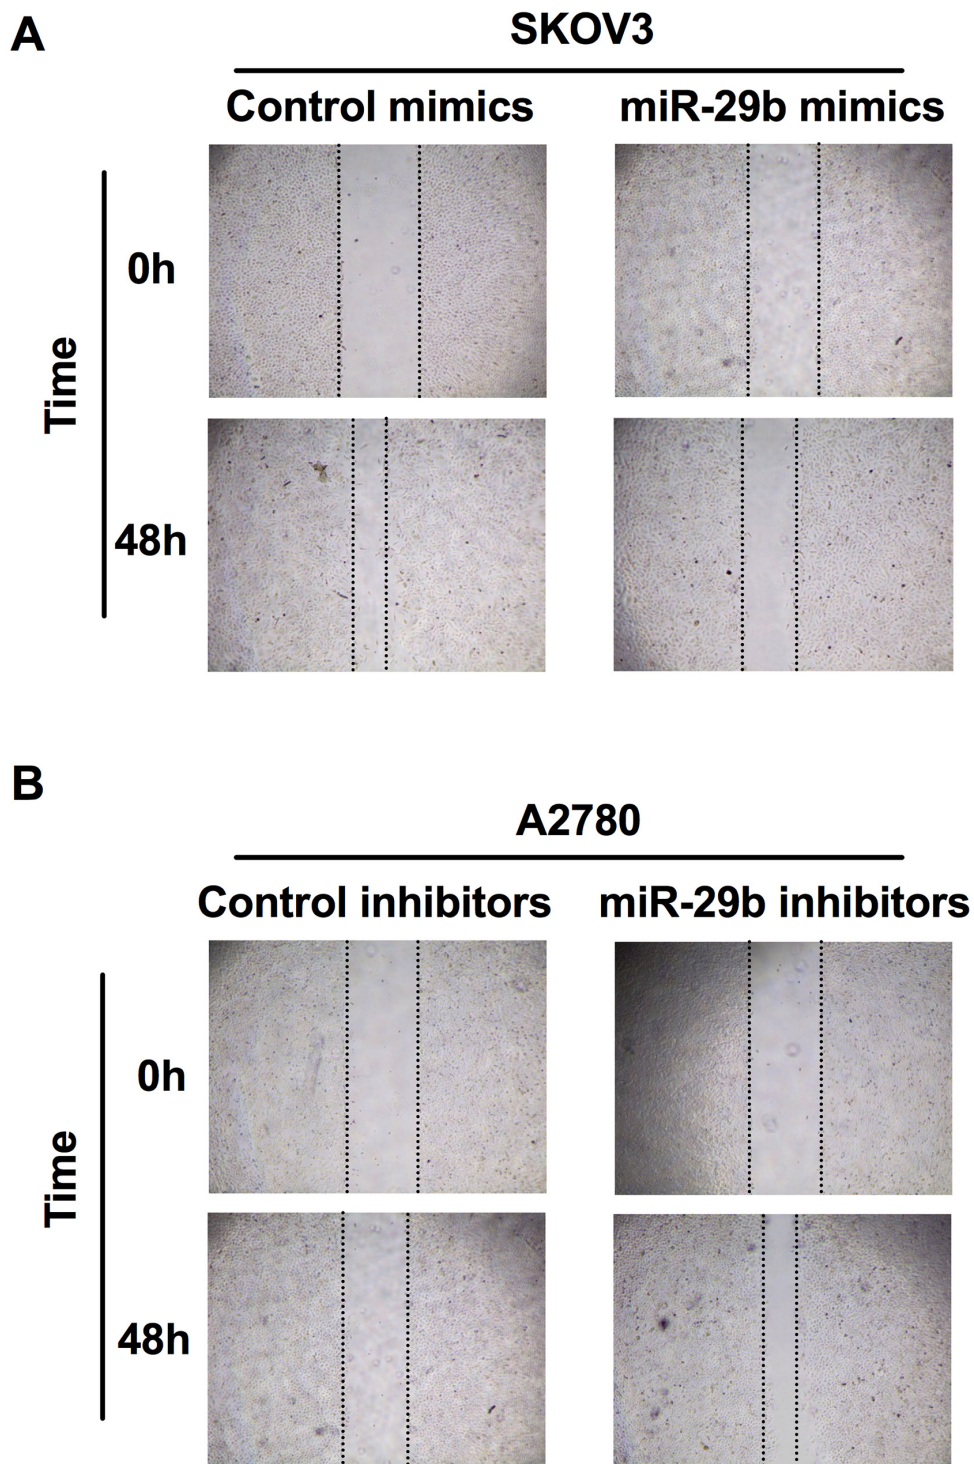

**Supplementary Figure S2: miR-29b expression negatively correlates with ovarian cancer cell migration capacity (Wound healing assay).** **A.** Representative images of wound healing show that mimics-mediated miR-29b overexpression in SKOV3 cells slows the wound healing. **B.** Representative images of wound healing show that inhibitors-mediated miR-29b knockdown in A2780 cells increases wound healing rate. The images of the wound healing assays were photographed under 100× magnification.

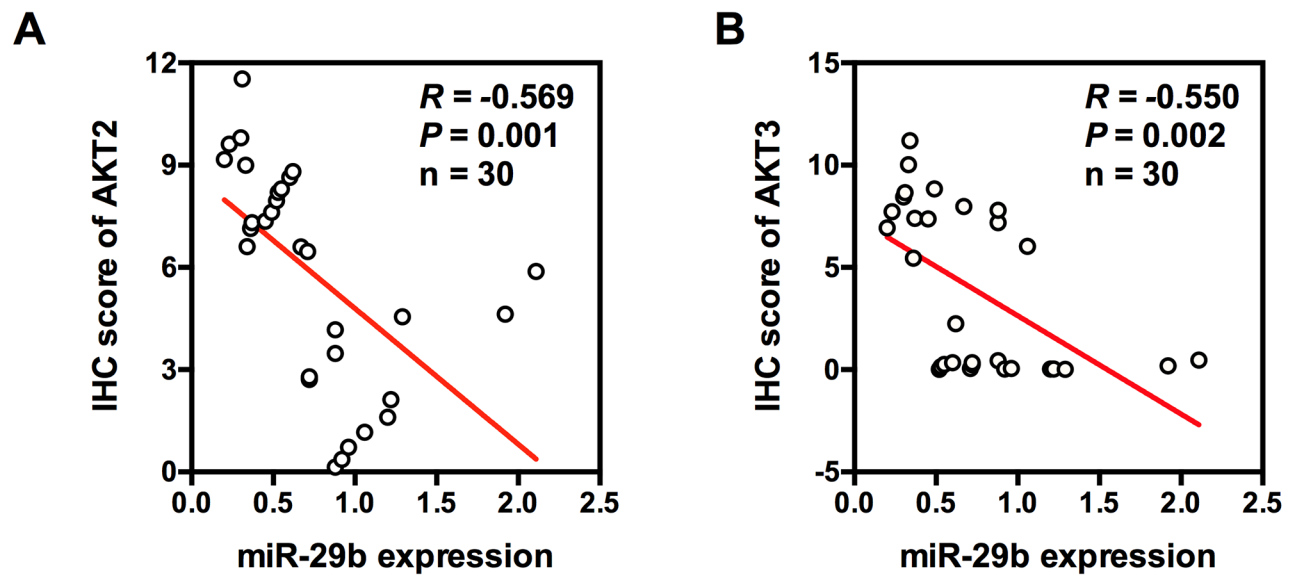

**Supplementary Figure S3: Association between expression of miR-29b and AKTs in ovarian cancer tissues.** A. Association between expression of miR-29b and AKT2 in 30 ovarian cancer samples (correlation coefficient  $R = -0.569$ ,  $P = 0.001$ ). B. Association between expression of miR-29b and AKT3 (correlation coefficient  $R = -0.550$ ,  $P = 0.002$ ).
